# Supplementary material
Source: PubMed Central journal article supplement (PMC2668134)
Supplement: NIHMS99292-supplement-1.pdf [file NIHMS99292-supplement-1.pdf]

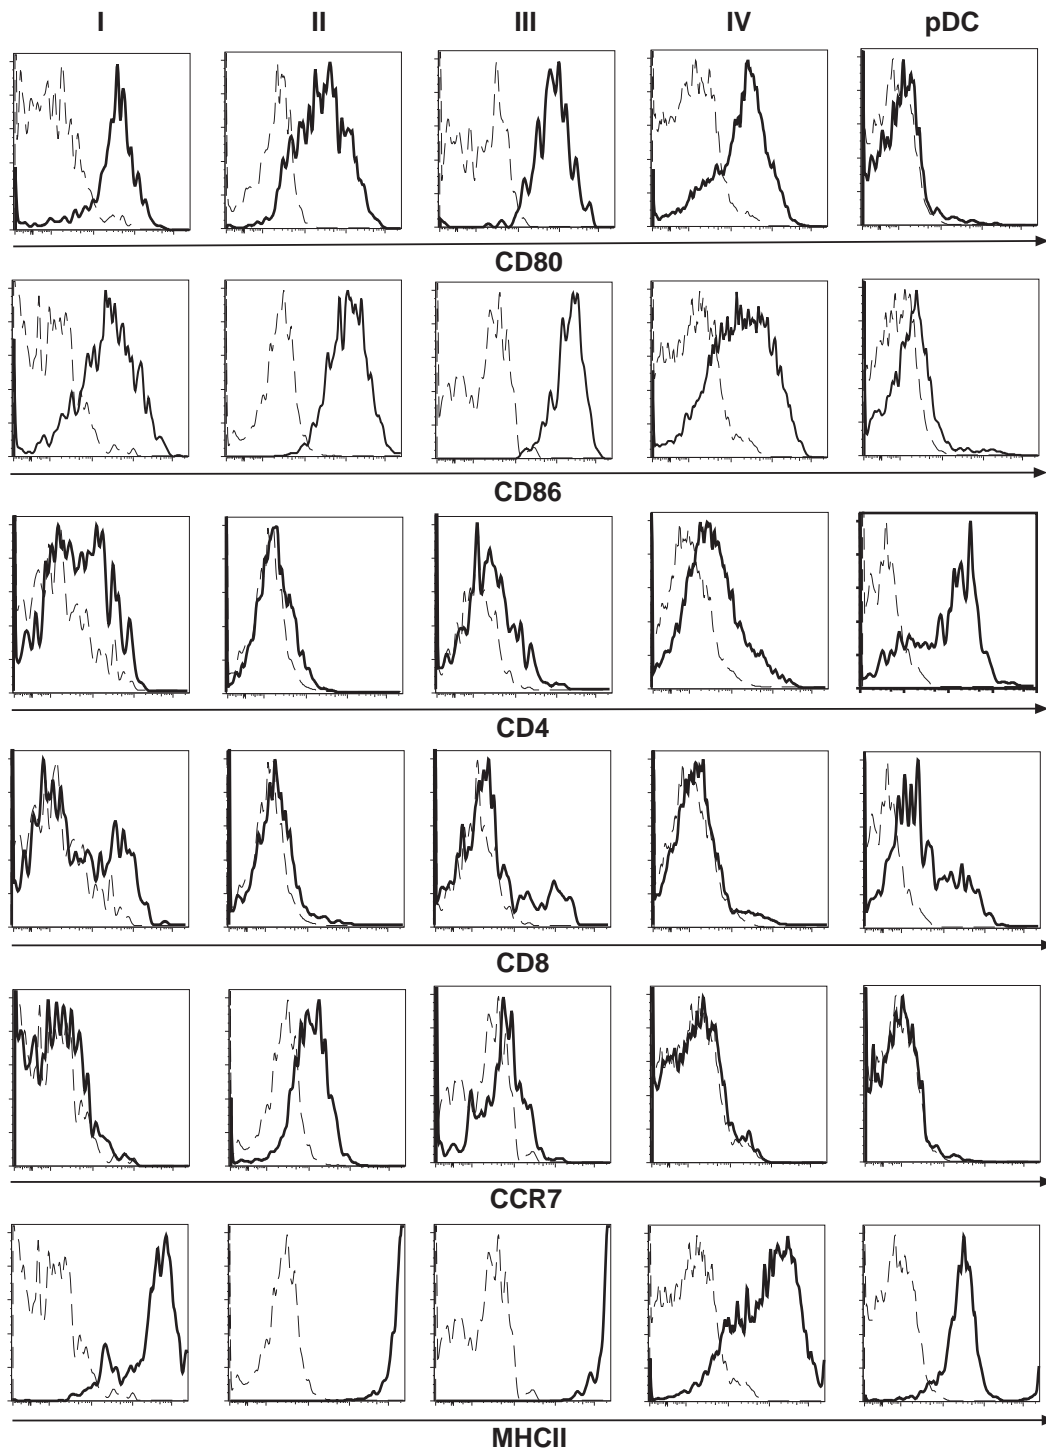

**Supplementary Figure 1.** The surface molecules on individual LN DC subset. Draining LN cells were isolated from plt mice that were immunized with OVA+CFA 4 days earlier. DCs were enriched on a 16% metrizamide gradient and subjected to flow analysis. Gating protocol is the same as in figure 2. Dashed line: IgG control; Solid line: Specific Ab staining.

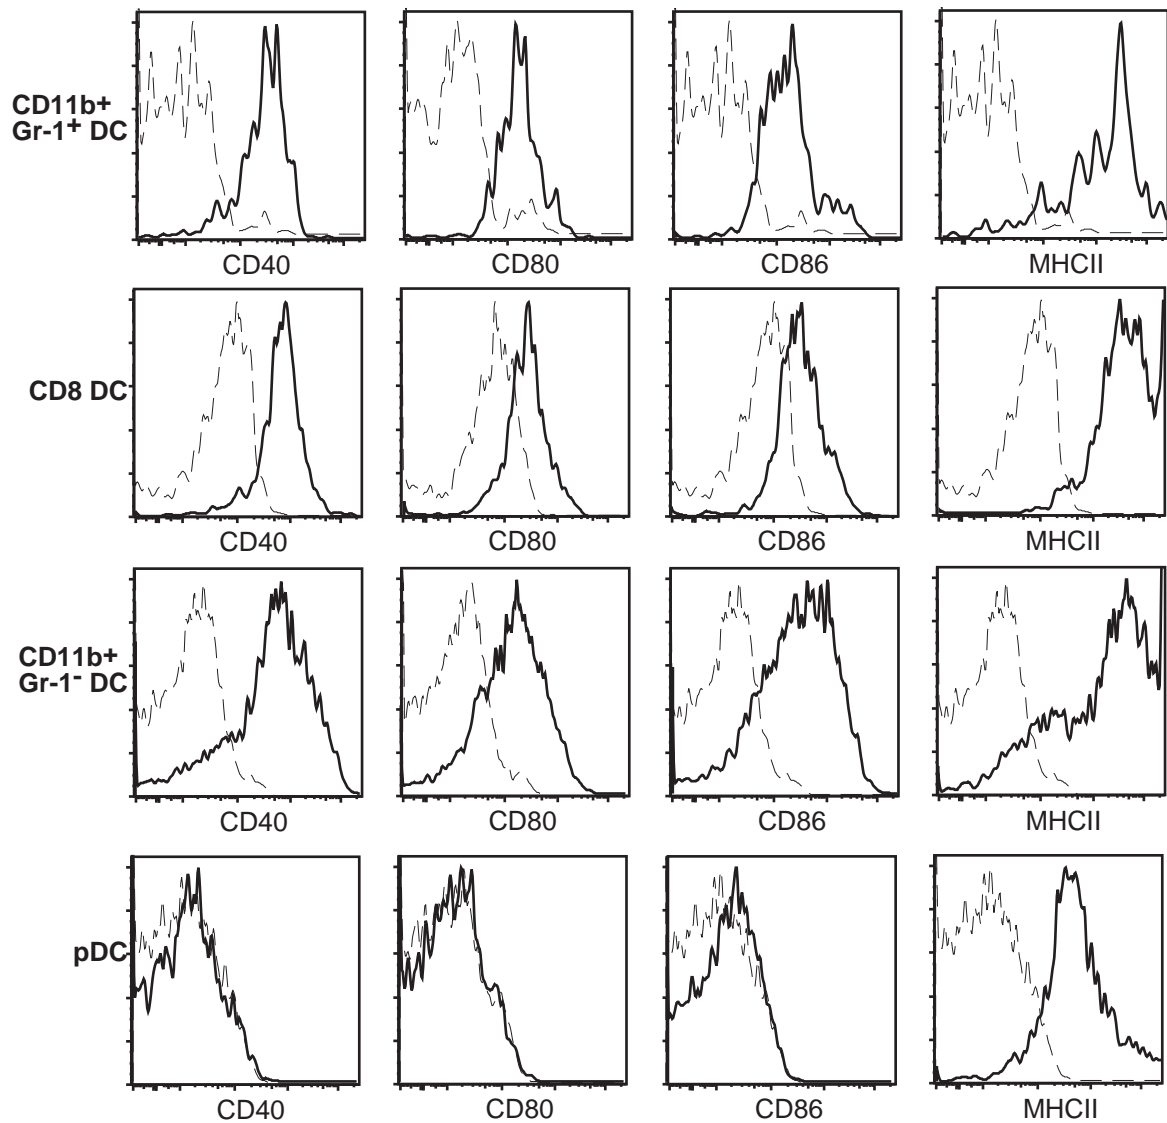

**Supplementary Figure 2.** Activation markers on Gr-1<sup>+</sup> DC. Draining LN cells were isolated from plt mice that were immunized with OVA+CFA 3 days earlier. DCs were enriched on a 16% metrizamide gradient and subjected to flow analysis. MoDCs (CD11c<sup>+</sup>CD8<sup>-</sup>CD11b<sup>hi</sup>Gr-1<sup>+</sup>); CD8DC (CD11c<sup>+</sup>CD8<sup>-</sup>CD11b<sup>int</sup>); pDC (CD11c<sup>+</sup>Gr-1<sup>+</sup>CD11b<sup>-</sup>). Dashed line: isotype control; thick line: Ab staining
